# Supplementary material for: Determination of Crystal Growth Rates in Multi-Component Solutions
Source: MDPI journal article supplement (doi:10.3390/cryst12111568), 2022-11-03
Supplement: s1 [file s1]

# Data of binary aqueous solutions of sodium sulfate decahydrate

| $T / ^\circ\text{C}$ | $w_{\text{init,Na}_2\text{SO}_4}$ | $w_{\text{end,Na}_2\text{SO}_4}$ | $k_d / \frac{m}{s}$ | $k_g / \frac{m}{s}$ | $g / -$ |
|----------------------|-----------------------------------|----------------------------------|---------------------|---------------------|---------|
| 23.5                 | 0.212                             | 0.406                            | $1.1 \cdot 10^{-5}$ |                     | 1       |
|                      | 0.214                             | 0.409                            | $1.0 \cdot 10^{-5}$ |                     |         |
|                      | 0.212                             | 0.407                            | $0.7 \cdot 10^{-5}$ |                     |         |
|                      | 0.435                             | 0.417                            |                     | $0.8 \cdot 10^{-5}$ |         |
|                      | 0.431                             | 0.413                            |                     | $1.1 \cdot 10^{-5}$ |         |
|                      | 0.431                             | 0.413                            |                     | $1.2 \cdot 10^{-5}$ |         |
|                      | 0.429                             | 0.418                            |                     | $0.8 \cdot 10^{-5}$ |         |
|                      | 0.490                             | 0.422                            |                     | $1.0 \cdot 10^{-5}$ |         |
| 22                   | 0.229                             | 0.371                            | $0.7 \cdot 10^{-5}$ |                     | 1       |
|                      | 0.447                             | 0.392                            |                     | $0.6 \cdot 10^{-5}$ |         |
|                      | 0.431                             | 0.384                            |                     | $1.1 \cdot 10^{-5}$ |         |
|                      | 0.460                             | 0.384                            |                     | $1.3 \cdot 10^{-5}$ |         |
|                      | 0.460                             | 0.392                            |                     | $2.5 \cdot 10^{-5}$ |         |
| 18.5                 | 0.347                             | 0.323                            |                     | $0.5 \cdot 10^{-5}$ | 1       |
|                      | 0.358                             | 0.328                            |                     | $0.2 \cdot 10^{-5}$ |         |
|                      | 0.333                             | 0.310                            |                     | $0.2 \cdot 10^{-5}$ |         |
|                      | 0.331                             | 0.308                            |                     | $0.2 \cdot 10^{-5}$ |         |
| 17                   | 0.210                             | 0.278                            | $0.9 \cdot 10^{-5}$ |                     | 1       |
|                      | 0.211                             | 0.279                            | $0.7 \cdot 10^{-5}$ |                     |         |
|                      | 0.351                             | 0.299                            |                     | $0.9 \cdot 10^{-5}$ |         |
|                      | 0.356                             | 0.302                            |                     | $0.5 \cdot 10^{-5}$ |         |
|                      | 0.358                             | 0.316                            |                     | $1.5 \cdot 10^{-5}$ |         |
|                      | 0.340                             | 0.296                            |                     | $0.8 \cdot 10^{-5}$ |         |
|                      | 0.338                             | 0.291                            |                     | $0.7 \cdot 10^{-5}$ |         |
