# Supplementary material for: Determination of Crystal Growth Rates in Multi-Component Solutions
Source: MDPI journal article supplement (doi:10.3390/cryst12111568), 2022-11-03
Supplement: s1 [file s1]

# Data of ternary aqueous solutions on sodium carbonate decahydrate substrates

## - solely crystallization of sodium carbonate decahydrate

| $T / ^\circ C$ | $w_{\text{init},\text{Na}_2\text{SO}_4}$ | $w_{\text{end},\text{Na}_2\text{SO}_4}$ | $w_{\text{init},\text{Na}_2\text{CO}_3}$ | $w_{\text{end},\text{Na}_2\text{CO}_3}$ | $k_{g,\text{Na}_2\text{SO}_4} / \frac{m}{s}$ | $g_{\text{Na}_2\text{SO}_4} / -$ | $k_{g,\text{Na}_2\text{CO}_3} / \frac{m}{s}$ | $g_{\text{Na}_2\text{CO}_3} / -$ |
|----------------|------------------------------------------|-----------------------------------------|------------------------------------------|-----------------------------------------|----------------------------------------------|----------------------------------|----------------------------------------------|----------------------------------|
| 23.5           | 0.342                                    | 0.369                                   | 0.456                                    | 0.424                                   | 0                                            | -                                | $0.04 \cdot 10^{-5}$                         | 1                                |
| 18.5           | 0.245                                    | 0.254                                   | 0.370                                    | 0.346                                   | 0                                            | -                                | $0.1 \cdot 10^{-5}$                          | 1                                |
|                | 0.262                                    | 0.283                                   | 0.293                                    | 0.245                                   | 0                                            |                                  | $0.05 \cdot 10^{-5}$                         |                                  |
| 17             | 0.256                                    | 0.274                                   | 0.407                                    | 0.322                                   | 0                                            | -                                | $0.04 \cdot 10^{-5}$                         | 1                                |
