# Supplementary material for: Determination of Crystal Growth Rates in Multi-Component Solutions
Source: MDPI journal article supplement (doi:10.3390/cryst12111568), 2022-11-03
Supplement: s1 [file s1]

# Data of ternary aqueous solutions on sodium sulfate decahydrate substrates

## - simultaneous crystallization

| $T / ^\circ C$ | $w_{init,Na_2SO_4}$ | $w_{end,Na_2SO_4}$ | $w_{init,Na_2CO_3}$ | $w_{end,Na_2CO_3}$ | $k_{g,Na_2SO_4} / \frac{m}{s}$ | $g_{Na_2SO_4} / -$ | $k_{g,Na_2CO_3} / \frac{m}{s}$ | $g_{Na_2CO_3} / -$ |
|----------------|---------------------|--------------------|---------------------|--------------------|--------------------------------|--------------------|--------------------------------|--------------------|
| 23.5           | 0.351               | 0.315              | 0.442               | 0.429              | $0.2 \cdot 10^{-5}$            | 1                  | $0.8 \cdot 10^{-5}$            | 1                  |
|                | 0.351               | 0.315              | 0.442               | 0.441              | $0.06 \cdot 10^{-5}$           |                    | $7.0 \cdot 10^{-5}$            |                    |
|                | 0.340               | 0.309              | 0.451               | 0.451              | $0.4 \cdot 10^{-5}$            |                    | $0.2 \cdot 10^{-5}$            |                    |
|                | 0.340               | 0.311              | 0.451               | 0.465              | $0.3 \cdot 10^{-5}$            |                    | $5.0 \cdot 10^{-5}$            |                    |
|                | 0.347               | 0.316              | 0.458               | 0.413              | $0.5 \cdot 10^{-5}$            |                    | $7.0 \cdot 10^{-5}$            |                    |
| 22             | 0.351               | 0.280              | 0.440               | 0.472              | $0.06 \cdot 10^{-5}$           | 1                  | $1.0 \cdot 10^{-5}$            | 1                  |
|                | 0.351               | 0.274              | 0.442               | 0.472              | $0.08 \cdot 10^{-5}$           |                    | $0.7 \cdot 10^{-5}$            |                    |
|                | 0.356               | 0.277              | 0.440               | 0.469              | $0.07 \cdot 10^{-5}$           |                    | $0.4 \cdot 10^{-5}$            |                    |
| 18.5           | 0.249               | 0.220              | 0.375               | 0.362              | $0.1 \cdot 10^{-5}$            | 1                  | $7.0 \cdot 10^{-5}$            | 1                  |
|                | 0.258               | 0.242              | 0.311               | 0.291              | $0.3 \cdot 10^{-5}$            |                    | $0.1 \cdot 10^{-5}$            | 1                  |
|                | 0.276               | 0.257              | 0.435               | 0.381              | $1.0 \cdot 10^{-5}$            |                    | $1.4 \cdot 10^{-5}$            | 1.2                |
|                | 0.273               | 0.233              | 0.435               | 0.379              | $0.7 \cdot 10^{-5}$            |                    | $7.0 \cdot 10^{-5}$            | 1                  |
| 17             | 0.249               | 0.202              | 0.389               | 0.390              | $0.1 \cdot 10^{-5}$            | 1                  | $0.4 \cdot 10^{-5}$            | 1                  |
|                | 0.249               | 0.201              | 0.386               | 0.395              | $0.08 \cdot 10^{-5}$           |                    | $0.6 \cdot 10^{-5}$            |                    |
|                | 0.247               | 0.202              | 0.383               | 0.389              | $0.08 \cdot 10^{-5}$           |                    | $0.4 \cdot 10^{-5}$            |                    |
|                | 0.247               | 0.206              | 0.372               | 0.350              | $0.2 \cdot 10^{-5}$            |                    | $1.0 \cdot 10^{-5}$            |                    |
|                | 0.245               | 0.195              | 0.370               | 0.371              | $0.04 \cdot 10^{-5}$           |                    | $1.0 \cdot 10^{-5}$            |                    |

Red marked values are not considered in average values, because mass transfer coefficients of sodium carbonate are greater than diffusion mass transfer coefficients.
