# Supplementary material for: Determination of Crystal Growth Rates in Multi-Component Solutions
Source: MDPI journal article supplement (doi:10.3390/cryst12111568), 2022-11-03
Supplement: s1 [file s1]

Data of ternary aqueous solutions on sodium sulfate decahydrate substrates  
- solely crystallization of sodium sulfate decahydrate

| $T / ^\circ C$ | $w_{\text{init,Na}_2\text{SO}_4}$ | $w_{\text{end,Na}_2\text{SO}_4}$ | $w_{\text{init,Na}_2\text{CO}_3}$ | $w_{\text{end,Na}_2\text{CO}_3}$ | $k_{g,\text{Na}_2\text{SO}_4} / \frac{m}{s}$ | $g_{\text{Na}_2\text{SO}_4} / -$ | $k_{g,\text{Na}_2\text{CO}_3} / \frac{m}{s}$ | $g_{\text{Na}_2\text{CO}_3} / -$ |
|----------------|-----------------------------------|----------------------------------|-----------------------------------|----------------------------------|----------------------------------------------|----------------------------------|----------------------------------------------|----------------------------------|
| 23.5           | 0.294                             | 0.263                            | 0.451                             | 0.473                            | $0.09 \cdot 10^{-5}$                         | 1                                | 0                                            | -                                |
| 22             | 0.349                             | 0.287                            | 0.437                             | 0.476                            | $0.04 \cdot 10^{-5}$                         | 1                                | 0                                            | -                                |
| 18.5           | 0.256                             | 0.233                            | 0.383                             | 0.396                            | $0.1 \cdot 10^{-5}$                          | 1                                | 0                                            | -                                |
|                | 0.247                             | 0.222                            | 0.372                             | 0.381                            | $0.1 \cdot 10^{-5}$                          |                                  | 0                                            |                                  |
