# Supplementary material for: Determination of Crystal Growth Rates in Multi-Component Solutions
Source: MDPI journal article supplement (doi:10.3390/cryst12111568), 2022-11-03
Supplement: s1 [file s1]

Data of binary aqueous solutions of sodium carbonate decahydrate

| $T / ^\circ C$ | $w_{\text{init,Na}_2\text{CO}_3}$ | $w_{\text{end,Na}_2\text{CO}_3}$ | $k_d / \frac{m}{s}$ | $k_g / \frac{m}{s}$   | $g / -$ |
|----------------|-----------------------------------|----------------------------------|---------------------|-----------------------|---------|
| 23.5           | 0.457                             | 0.545                            | $0.8 \cdot 10^{-5}$ |                       | 1       |
|                | 0.257                             | 0.549                            | $1.2 \cdot 10^{-5}$ |                       |         |
|                | 0.257                             | 0.549                            | $1.1 \cdot 10^{-5}$ |                       |         |
|                | 0.610                             | 0.579                            |                     | $0.3 \cdot 10^{-5}$   |         |
|                | 0.666                             | 0.579                            |                     | $0.5 \cdot 10^{-5}$   |         |
|                | 0.662                             | 0.577                            |                     | $0.7 \cdot 10^{-5}$   |         |
| 22             | 0.602                             | 0.537                            |                     | $2.9 \cdot 10^{-5}$   | 1       |
|                | 0.577                             | 0.506                            |                     | $1.0 \cdot 10^{-5}$   |         |
|                | 0.583                             | 0.505                            |                     | $1.4 \cdot 10^{-5}$   |         |
|                | 0.594                             | 0.523                            |                     | $0.4 \cdot 10^{-5}$   |         |
|                | 0.591                             | 0.525                            |                     | $1.7 \cdot 10^{-5}$   |         |
|                | 0.585                             | 0.525                            |                     | $0.8 \cdot 10^{-5}$   |         |
|                | 0.559                             | 0.524                            |                     | $0.7 \cdot 10^{-5}$   |         |
| 18.5           | 0.459                             | 0.434                            |                     | $0.6 \cdot 10^{-5}$   | 1       |
|                | 0.459                             | 0.436                            |                     | $0.7 \cdot 10^{-5}$   | 1       |
|                | 0.483                             | 0.454                            |                     | $0.03 \cdot 10^{-5}$  | 1.6     |
|                | 0.478                             | 0.455                            |                     | $0.8 \cdot 10^{-5}$   | 1       |
|                | 0.464                             | 0.438                            |                     | $0.02 \cdot 10^{-5}$  | 1.7     |
| 17             | 0.263                             | 0.401                            | $0.9 \cdot 10^{-5}$ |                       | 1       |
|                | 0.251                             | 0.399                            | $0.6 \cdot 10^{-5}$ |                       |         |
|                | 0.252                             | 0.376                            | $1.1 \cdot 10^{-5}$ |                       |         |
|                | 0.271                             | 0.405                            | $0.9 \cdot 10^{-5}$ |                       |         |
|                | 0.478                             | 0.428                            |                     | $0.07 \cdot 10^{-5}$  | 1.5     |
|                | 0.480                             | 0.428                            |                     | $0.08 \cdot 10^{-5}$  | 1.6     |
|                | 0.472                             | 0.417                            |                     | $0.007 \cdot 10^{-5}$ | 2.0     |
|                | 0.469                             | 0.416                            |                     | $0.4 \cdot 10^{-5}$   | 1.0     |
|                | 0.467                             | 0.415                            |                     | $0.04 \cdot 10^{-5}$  | 1.5     |
|                | 0.475                             | 0.420                            |                     | $0.08 \cdot 10^{-5}$  | 1.4     |
|                | 0.472                             | 0.420                            |                     | $0.3 \cdot 10^{-5}$   | 1.0     |
