# Supplementary material for: Determination of Crystal Growth Rates in Multi-Component Solutions
Source: MDPI journal article supplement (doi:10.3390/cryst12111568), 2022-11-03
Supplement: s1 [file s1]

# Data of dissolution of either sodium carbonate decahydrate or sodium sulfate decahydrate in presence of the other component

| $T / ^\circ C$ | $w_{init,Na_2SO_4}$ | $w_{end,Na_2SO_4}$ | $w_{init,Na_2CO_3}$ | $w_{end,Na_2CO_3}$ | $k_{d,Na_2CO_3} / \frac{m}{s}$ | $k_{d,Na_2SO_4} / \frac{m}{s}$ |
|----------------|---------------------|--------------------|---------------------|--------------------|--------------------------------|--------------------------------|
| 23.5           | 0.213               | 0.123              | 0                   | 0.499              | $1.9 \cdot 10^{-5}$            |                                |
|                | 0.219               | 0.159              | 0                   | 0.489              | $1.6 \cdot 10^{-5}$            |                                |
|                | 0.215               | 0.122              | 0                   | 0.487              | $1.1 \cdot 10^{-5}$            |                                |
|                | 0                   | 0.354              | 0.268               | 0.169              |                                | $0.8 \cdot 10^{-5}$            |
|                | 0                   | 0.351              | 0.251               | 0.169              |                                | $1.0 \cdot 10^{-5}$            |
|                | 0.187               | 0.352              | 0.256               | 0.176              |                                | $0.5 \cdot 10^{-5}$            |
| 22             | 0.218               | 0.130              | 0                   | 0.457              | $1.0 \cdot 10^{-5}$            |                                |
|                | 0.218               | 0.135              | 0                   | 0.461              | $1.0 \cdot 10^{-5}$            |                                |
|                | 0.220               | 0.151              | 0                   | 0.449              | $0.7 \cdot 10^{-5}$            |                                |
| 17             | 0                   | 0.224              | 0.258               | 0.191              |                                | $0.6 \cdot 10^{-5}$            |
|                | 0                   | 0.224              | 0.246               | 0.191              |                                | $0.4 \cdot 10^{-5}$            |
|                | 0.221               | 0.179              | 0                   | 0.344              | $0.9 \cdot 10^{-5}$            |                                |
|                | 0.216               | 0.196              | 0                   | 0.401              | $0.4 \cdot 10^{-5}$            |                                |
|                | 0.216               | 0.155              | 0                   | 0.366              | $1.1 \cdot 10^{-5}$            |                                |
|                | 0.210               | 0.167              | 0                   | 0.349              | $0.8 \cdot 10^{-5}$            |                                |
|                | 0.209               | 0.174              | 0                   | 0.350              | $1.1 \cdot 10^{-5}$            |                                |
