# Supplementary material for: Determination of Crystal Growth Rates in Multi-Component Solutions
Source: MDPI journal article supplement (doi:10.3390/cryst12111568), 2022-11-03
Supplement: s1 [file s1]

# Data of ternary aqueous solutions on sodium carbonate decahydrate substrates - simultaneous crystallization

| $T / ^\circ C$ | $w_{init,Na_2SO_4}$ | $w_{end,Na_2SO_4}$ | $w_{init,Na_2CO_3}$ | $w_{end,Na_2CO_3}$ | $k_{g,Na_2SO_4} / \frac{m}{s}$ | $g_{Na_2SO_4} / -$ | $k_{g,Na_2CO_3} / \frac{m}{s}$ | $g_{Na_2CO_3} / -$ |
|----------------|---------------------|--------------------|---------------------|--------------------|--------------------------------|--------------------|--------------------------------|--------------------|
| 22             | 0.354               | 0.340              | 0.445               | 0.408              | $3.0 \cdot 10^{-7}$            | 2                  | $0.2 \cdot 10^{-5}$            | 1                  |
| 18.5           | 0.259               | 0.237              | 0.291               | 0.251              | $0.2 \cdot 10^{-7}$            | 2                  | $0.9 \cdot 10^{-5}$            | 1                  |
|                | 0.267               | 0.281              | 0.288               | 0.240              | $0.5 \cdot 10^{-7}$            |                    | $0.2 \cdot 10^{-5}$            |                    |
|                | 0.264               | 0.197              | 0.419               | 0.347              | $0.06 \cdot 10^{-7}$           |                    | $0.5 \cdot 10^{-5}$            |                    |
|                | 0.263               | 0.197              | 0.418               | 0.347              | $0.06 \cdot 10^{-7}$           |                    | $0.5 \cdot 10^{-5}$            |                    |
| 17             | 0.243               | 0.197              | 0.370               | 0.342              | $0.1 \cdot 10^{-7}$            | 2                  | $0.4 \cdot 10^{-5}$            | 1                  |
|                | 0.238               | 0.228              | 0.364               | 0.336              | $0.6 \cdot 10^{-7}$            |                    | $0.06 \cdot 10^{-5}$           |                    |
|                | 0.240               | 0.226              | 0.370               | 0.332              | $3.0 \cdot 10^{-7}$            |                    | $0.08 \cdot 10^{-5}$           |                    |
|                | 0.238               | 0.237              | 0.370               | 0.330              | $0.7 \cdot 10^{-7}$            |                    | $0.06 \cdot 10^{-5}$           |                    |
|                | 0.263               | 0.198              | 0.418               | 0.347              | $0.07 \cdot 10^{-7}$           |                    | $0.5 \cdot 10^{-5}$            |                    |
|                | 0.261               | 0.264              | 0.416               | 0.322              | $5.0 \cdot 10^{-7}$            |                    | $0.05 \cdot 10^{-5}$           |                    |
